# Supplementary material for: A flexible microporous framework with temperature-dependent gate-opening behaviours for C2 gases
Source: Royal Society of Chemistry journal article supplement (doi:10.1039/d1cc00014d), 2021-01-01
Supplement: d1cc00014d1.pdf [file d1cc00014d1.pdf]

## Supplementary Information

### A flexible microporous framework with temperature-dependent gate-opening behaviours for C<sub>2</sub> gases†

Zhenyu Ji,<sup>a,b</sup> Yerong Fan,<sup>a</sup> Mingyan Wu\*, Maochun Hong\*

<sup>a</sup> College of Chemistry, Fuzhou University, Fuzhou, Fujian 350108, China.

<sup>b</sup> State Key Laboratory of Structural Chemistry, Fujian Institute of Research on the Structure of Matter, Chinese Academy of Sciences, Fuzhou, Fujian, 350002, China

#### Materials and Instrumentation

All reagents and solvents used in synthetic studies were commercially available and used as supplied without further purification. Elemental analyses for C, H, N were carried out on a German Elementary Vario EL III instrument. Single crystal X-ray diffraction experiments were carried on a Synergy Custom (Liquid MetalJet D2+) diffractometer, with Ga K $\alpha$  radiation ( $\lambda = 1.34050 \text{ \AA}$ ) by using a  $\omega$  scan mode. PXRD patterns were collected by an Empyrean X-ray diffractometer using CuK $\alpha$  radiation. Thermogravimetric analyses were recorded on a NETZSCH STA 449C unit at a heating rate of  $10 \text{ }^\circ\text{Cmin}^{-1}$  under nitrogen atmosphere. Gas sorption isotherms of activated **1**<sub>des</sub> were measured on a Micromeritics 2020 surface area analyzer.

#### Synthesis of **1** and **1**<sub>des</sub>

Co(NO<sub>3</sub>)<sub>2</sub>·6H<sub>2</sub>O (0.1mmol, 0.0291g), DMIPM (0.05mmol, 0.0106g) and H<sub>2</sub>BDC (0.1mmol, 0.0166g) were dissolved in 6ml DMF. The mixed solution was stirred at room temperature until it became clear. Then the resulted solution was sealed in a 10 ml Pyrex vial and heated at 85 °C for 3days. After cooling to room temperature, the plate-like black crystals of **1** were collected at the bottom of the bottle with a yield of ca 40% based on DMIPM.

As-synthesized **1**<sub>des</sub> (200mg) was washed three times with DMF and acetone, and then the sample was exchanged in acetone for 7 days. During the solvent exchange, fresh acetone was used to replace the exchanged acetone, three times a day. After the solvent exchange was complete, filter out the **1**, then place the sample under vacuum for 12 hours, and then place the sample under vacuum at 80 °C for

10 hours to obtain **1<sub>des</sub>**. Element analysis (%) for **1<sub>des</sub>**. Calculated: C, 48.99; H, 2.94; N, 12.24. Experiment: C, 49.24; H, 2.91; N, 12.27.

### **Single-Crystal X-ray Crystallography**

Single crystal X-ray diffraction experiments were carried on a Synergy Custom (Liquid MetalJet D2+) diffractometer, with GaK $\alpha$  radiation ( $\lambda = 1.34050 \text{ \AA}$ ) at 273K and 298K. The crystal structure was resolved by direct methods and refined by full-matrix least squares fitting on  $F_2$  using the SHELXL-2016 software package. All non-hydrogen atoms were refined with anisotropic thermal parameters. The hydrogen atoms on the aromatic rings were located at geometrically calculated positions and refined by riding. In **1** the diffused electron densities resulting from these solvent molecules were removed using the SQUEEZE routine of PLATON.

**Table S1.** Summary of crystal data and structure refinements for **1** and **1<sub>des</sub>**

| <b>Compounds</b>                           | <b>1</b>                                                                      | <b>1<sub>des</sub></b>                                                        |
|--------------------------------------------|-------------------------------------------------------------------------------|-------------------------------------------------------------------------------|
| CCDC                                       | 2053355                                                                       | 2053456                                                                       |
| Empirical formula                          | C <sub>28</sub> H <sub>20</sub> N <sub>6</sub> O <sub>8</sub> Co <sub>2</sub> | C <sub>28</sub> H <sub>20</sub> N <sub>6</sub> O <sub>8</sub> Co <sub>2</sub> |
| Formula weight                             | 686.36                                                                        | 686.36                                                                        |
| T (K)                                      | 298                                                                           | 298                                                                           |
| Crystal system                             | <i>monoclinic</i>                                                             | <i>monoclinic</i>                                                             |
| Space group                                | C2/c                                                                          | P2 <sub>1</sub> /n                                                            |
| <i>a</i> (Å)                               | 16.23320(10)                                                                  | 10.0100(4)                                                                    |
| <i>b</i> (Å)                               | 14.59330(10)                                                                  | 18.7883(5)                                                                    |
| <i>c</i> (Å)                               | 31.8280(8)                                                                    | 16.0273(5)                                                                    |
| $\alpha$ (°)                               | 90                                                                            | 90                                                                            |
| $\beta$ (°)                                | 93.5300(10)                                                                   | 95.972(3)                                                                     |
| $\gamma$ (°)                               | 90                                                                            | 90                                                                            |
| V (Å <sup>3</sup> )                        | 7525.62(10)                                                                   | 2997.91(17)                                                                   |
| Z                                          | 8                                                                             | 4                                                                             |
| Size/mm <sup>3</sup>                       | 0.2×0.2×0.25                                                                  | 0.1×0.1×0.1                                                                   |
| Density(g/cm <sup>3</sup> )                | 1.395                                                                         | 1.525                                                                         |
| Radiation                                  | GaK $\alpha$                                                                  | GaK $\alpha$                                                                  |
| $\rho_{\text{calcd}}$ (g/cm <sup>3</sup> ) | 1.212                                                                         | 1.525                                                                         |
| $\mu$ (mm <sup>-1</sup> )                  | 5.106                                                                         | 6.409                                                                         |
| F(000)                                     | 2784.0                                                                        | 1392.0                                                                        |
| T (K)                                      | 173                                                                           | 293                                                                           |
| Measured refls.                            | 27478                                                                         | 21835                                                                         |
| Independent refls.                         | 8376                                                                          | 6636                                                                          |
| R <sub>int</sub>                           | 0.0240                                                                        | 0.045                                                                         |
| R1/wR2 [I > 2 $\sigma$ (I)]                | 0.0294/ 0.0706                                                                | 0.039/0.103                                                                   |
| GOF on F <sup>2</sup>                      | 1.032                                                                         | 1.004                                                                         |

$${}^a R_1 = \sum \| |F_o| - |F_c| \| / \sum |F_o| \quad . \quad {}^b wR_2 = [\sum w(F_o^2 - F_c^2)^2 / \sum w(F_o^2)]^{1/2}$$

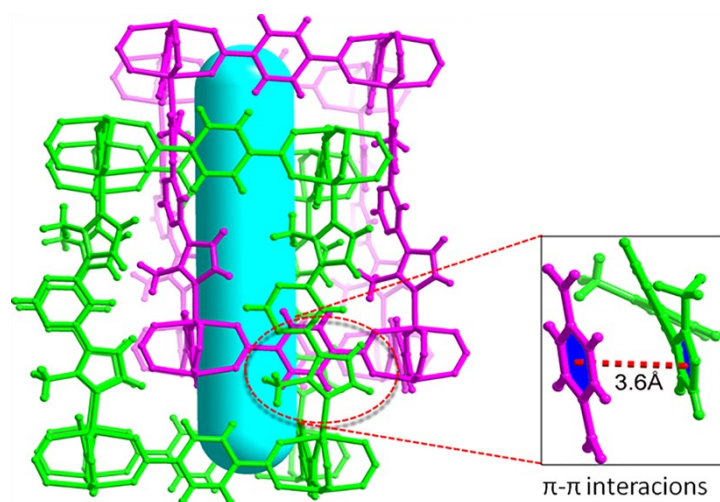

**Figure S1.** A representation of the two interpenetrating frameworks in **1** with the large channel along *c* direction. The pyrimidine and imidazole groups are arranged by  $\pi$ - $\pi$  interactions (3.6 Å).

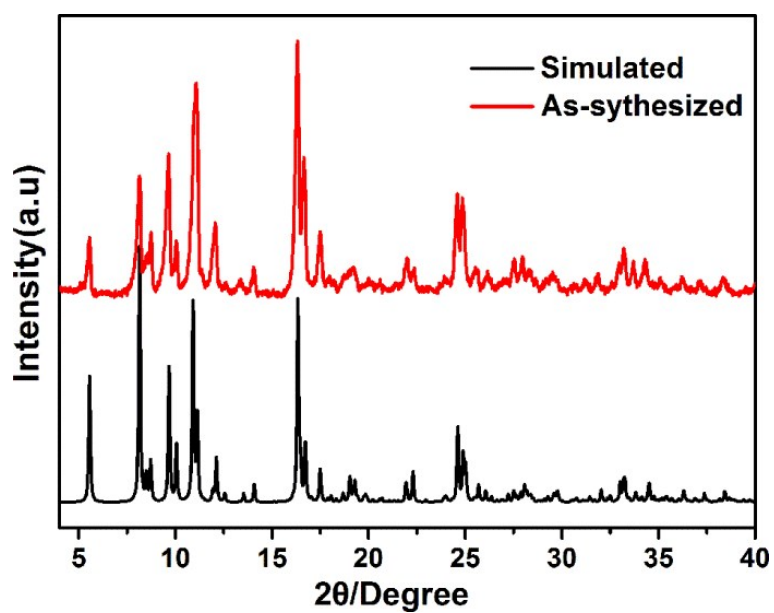

**Figure S2.** The PXRD patterns of **1**.

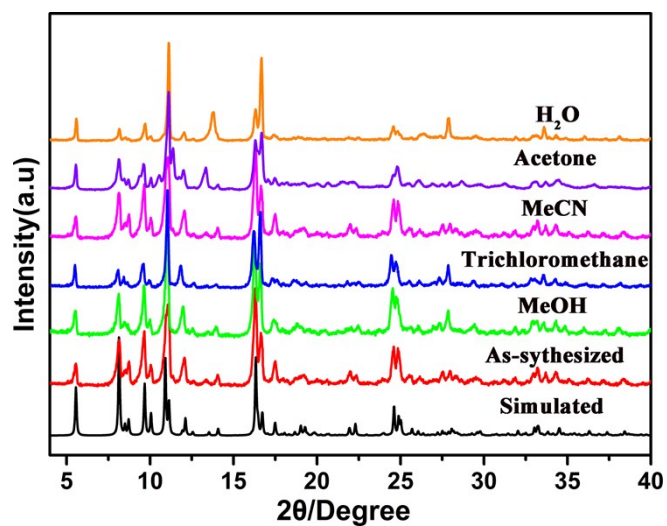

Figure S3. PXRD patterns of **1** after treatment with MeOH, CHCl<sub>3</sub>, MeCN, Acetone and

H<sub>2</sub>O

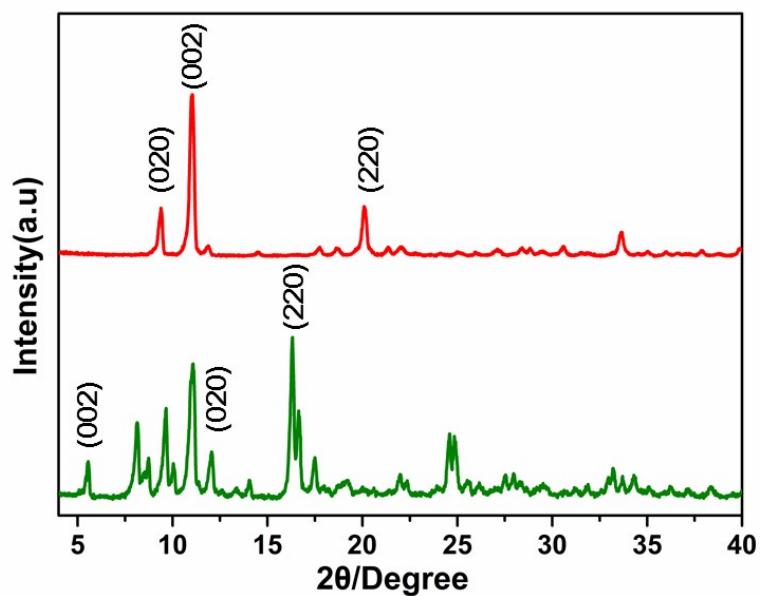

Figure S4 Comparison of the PXRD patterns of **1** (green) and **1<sub>des</sub>** (red).

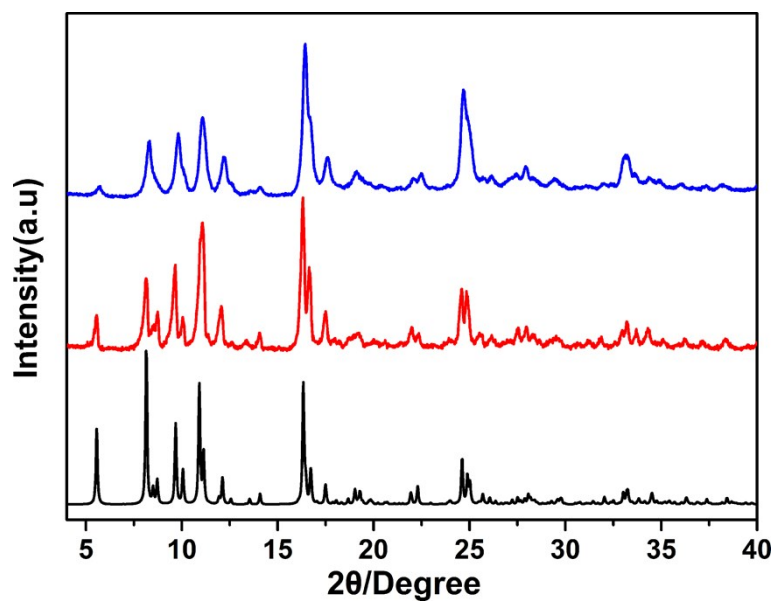

**Figure S5.** The PXRD patterns of **1** simulated (black), **1** as synthesized (red) and **1**<sub>des</sub> soaked in DMF.

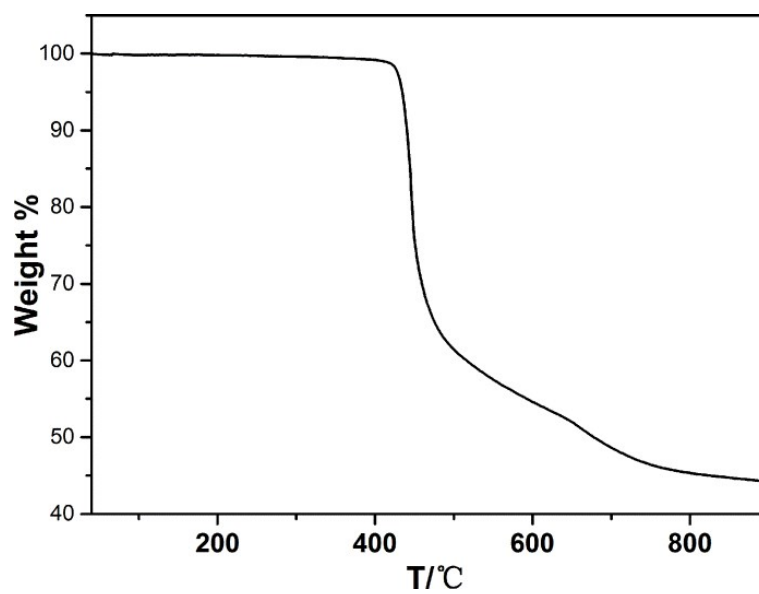

**Figure S6.** The thermogravimetric analysis of as-synthesized **1**<sub>des</sub>.

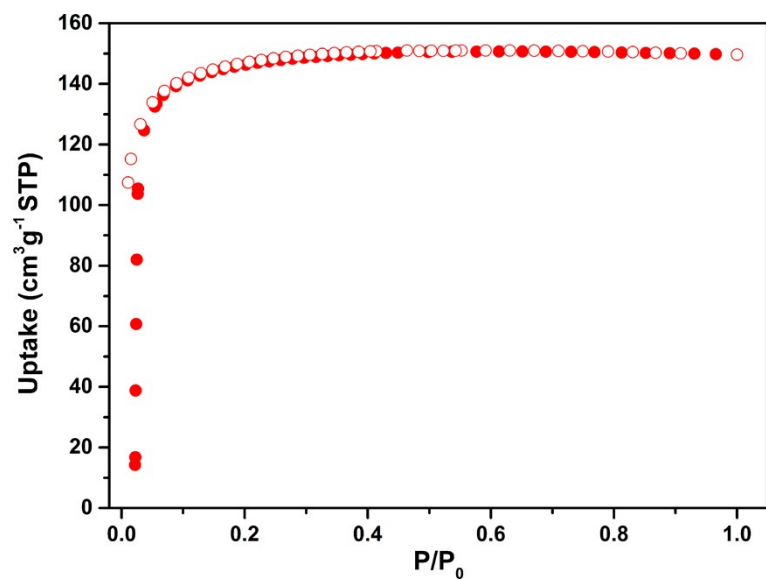

**Figure S7.** The CO<sub>2</sub> sorption isotherms of **1<sub>des</sub>** at 195K.

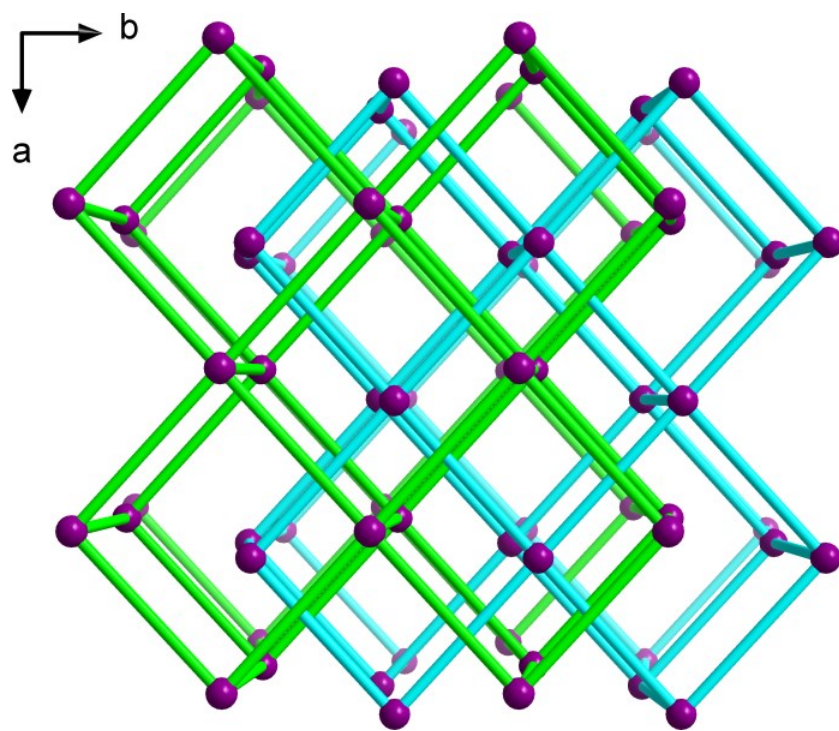

**Figure S8.** The two interpenetrated topology are shown in green and light blue respectively.

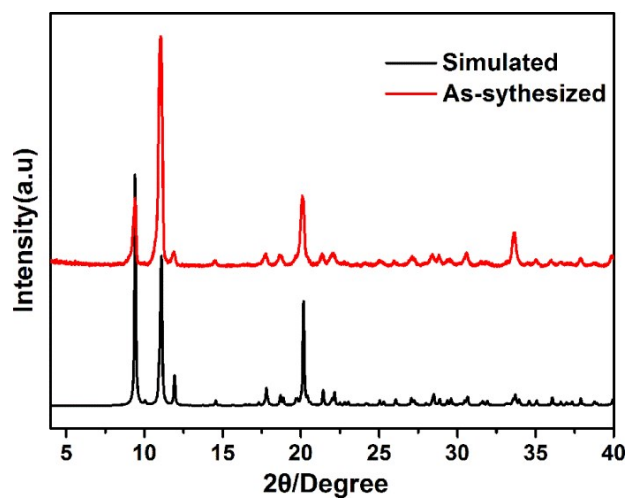

Figure S9. The PXR D patterns of  $\mathbf{1}_{des}$ .

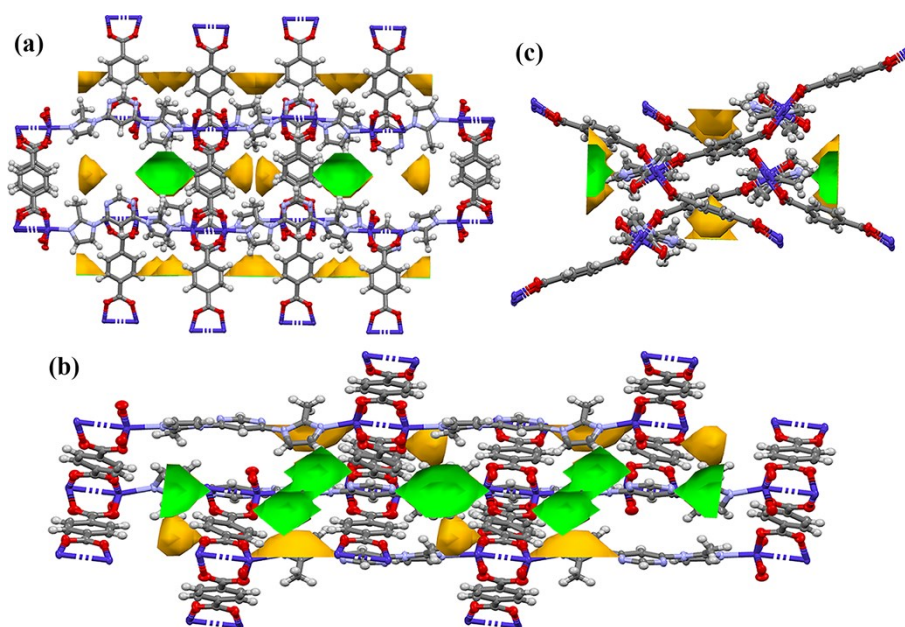

Figure S10. A representation of the non-porosity of  $\mathbf{1}_{des}$  in different directions. (a)  $a$  axis, (b)  $b$  axis, (c)  $c$  axis



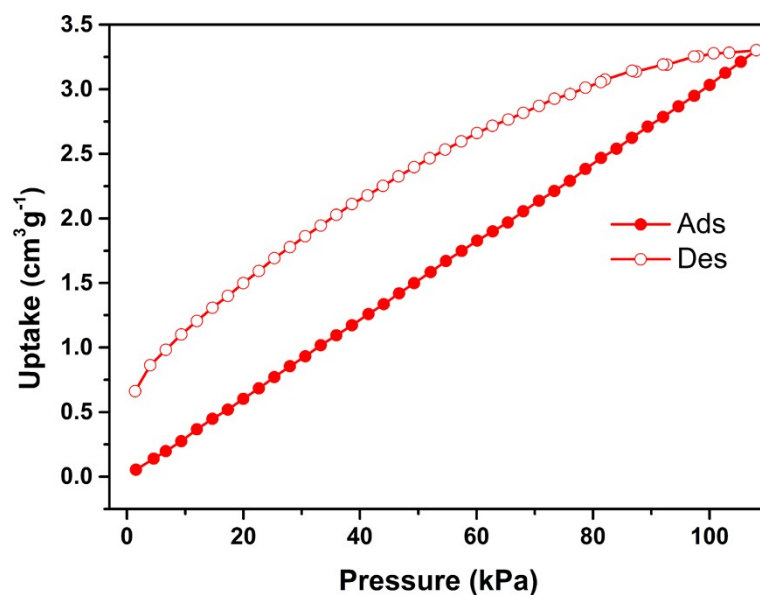

**Figure S11.** The adsorption isotherm of  $1_{\text{des}}$  for  $\text{CO}_2$  at 298 K.

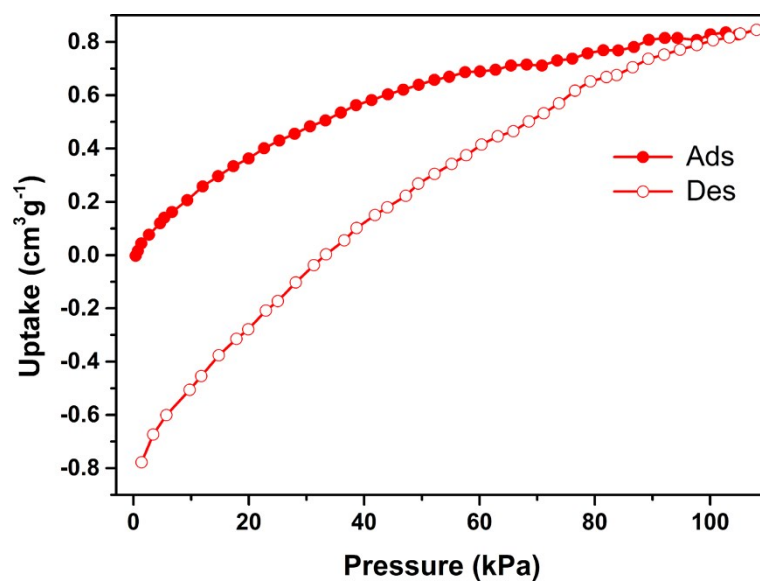

**Figure S12.** The adsorption isotherm of  $1_{\text{des}}$  for  $\text{N}_2$  at 298 K.

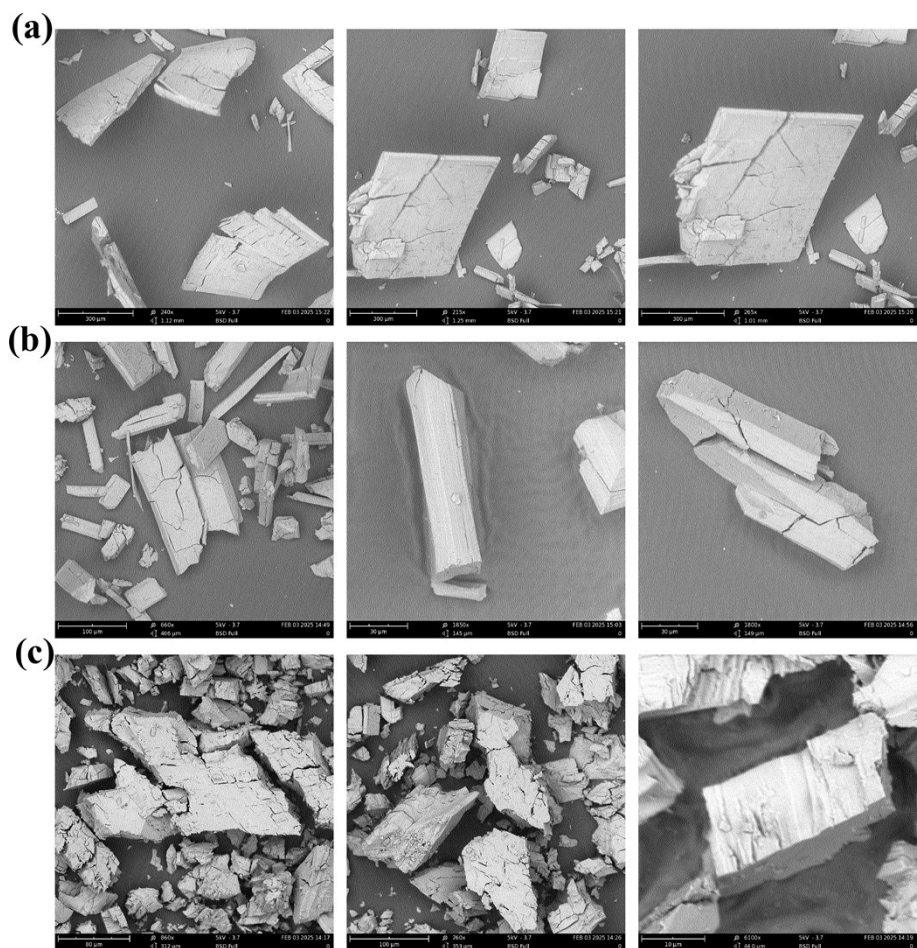

Figure S13. The SEM images of 1 (a), 1<sub>des</sub> (b), and the sample after adsorption (c).
